# Supplementary material
Source: bioRxiv or medRxiv preprint supplement (https://medrxiv.org/highwire/filestream/97041/field_highwire_adjunct_files/7/2020.09.11.20187369-8.pdf)
Supplement: Supplementary file [file 2020.09.11.20187369-8.pdf]

**Supplementary Table 3. Cohort 3 basic characteristics. (related to Figure 8)**

| <b>Patient ID</b> | <b>Age</b> | <b>Sex</b> | <b>Death</b> |
|-------------------|------------|------------|--------------|
| COR005            | 60-69      | F          | no           |
| COR010            | 70-79      | M          | <b>yes</b>   |
| COR011            | 80-89      | M          | <b>yes</b>   |
| COR012            | 70-79      | M          | <b>yes</b>   |
| COR013            | 60-69      | M          | no           |
| COR014            | 40-49      | M          | no           |
| COR015            | 70-79      | M          | no           |
| COR016            | 70-79      | M          | no           |
| COR017            | 60-69      | M          | no           |
| COR018            | 60-69      | F          | no           |
| COR019            | 70-79      | M          | no           |
| COR021            | 70-79      | M          | no           |
| COR022            | 60-69      | M          | no           |
| COR025            | 60-69      | F          | <b>yes</b>   |
| COR026            | 70-79      | F          | no           |
| COR027            | 60-69      | M          | no           |
| COR028            | 60-69      | F          | no           |
| COR031            | 70-79      | M          | no           |
| COR032            | 50-59      | M          | no           |
| COR033            | 60-69      | M          | no           |
| COR035            | 50-59      | M          | no           |
| COR037            | 50-59      | F          | no           |
| COR039            | 60-69      | M          | no           |
| COR041            | 60-69      | M          | no           |
| COR042            | 60-69      | M          | no           |
| COR043            | 70-79      | M          | no           |
| COR045            | 60-69      | M          | <b>yes</b>   |
| COR046            | 40-49      | F          | no           |
| COR048            | 60-69      | F          | no           |
| COR050            | 70-79      | M          | no           |
| COR053            | 70-79      | M          | no           |
| COR054            | 50-59      | M          | no           |
| COR055            | 70-79      | M          | <b>yes</b>   |
| COR056            | 60-69      | F          | no           |
| COR057            | 60-69      | M          | <b>yes</b>   |
| COR059            | 50-59      | M          | no           |
| COR060            | 50-59      | M          | no           |
| COR062            | 60-69      | F          | no           |
| COR066            | 50-59      | M          | no           |
| COR067            | 20-29      | M          | no           |
